# Supplementary material
Source: PubMed Central journal article supplement (PMC514443)

(A)

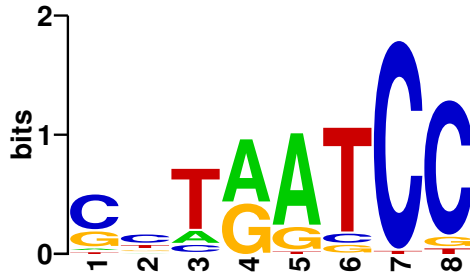

(B)

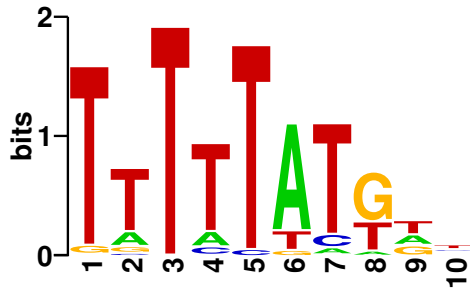

(C)

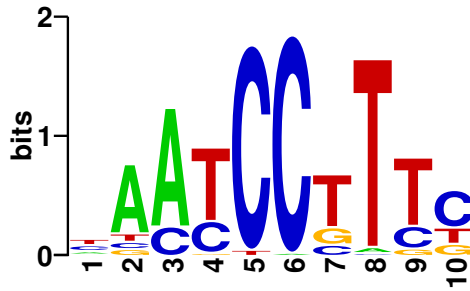

Supplement: pnas_101_33_12114__1.pdf [file pnas_101_33_12114__1.pdf]

(A)

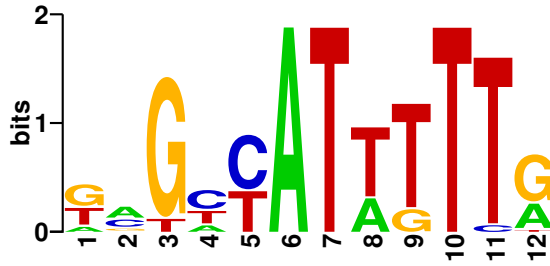

(B)

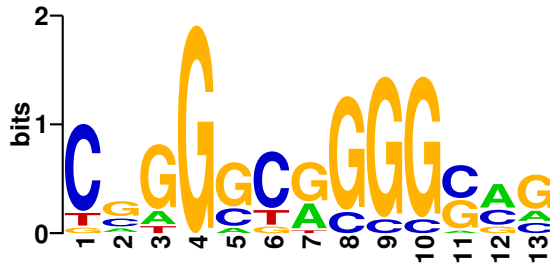

(C)

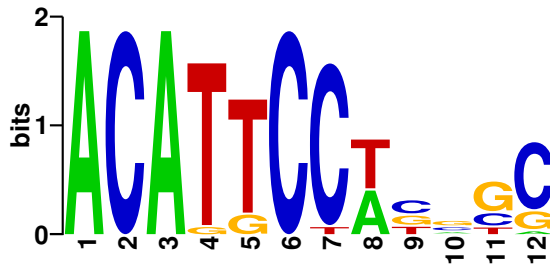

(D)

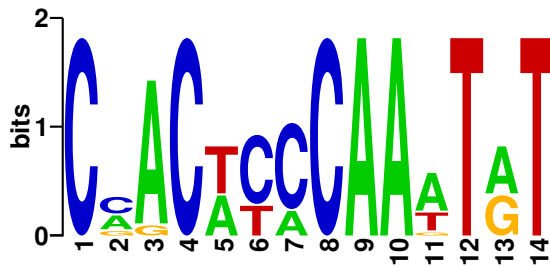

Supplement: pnas_101_33_12114__2.pdf [file pnas_101_33_12114__2.pdf]
